# Supplementary material for: Modeling kinetic rate variation in third generation DNA sequencing data to detect putative modifications to DNA bases
Source: HighWire-hosted journal article supplement (doi:10.1101/gr.136739.111), 2012-10-23
Supplement: Supplemental_Material.pdf [file Supplemental_Material.pdf]

## Supplementary Tables

**Supplementary Table 1.** Models of increasing complexity when applied to reference position 54 in the 8-oxoG template described in the main text capture more information resulting in statistically significant increases in the likelihoods (from least to most complex models). The different models tested are given along the columns. In going from a multisite likelihood model (Multi-site Mixture) to a CRF with nearest neighbor interactions (CRF2), the  $-\log$ likelihood drops from 4010.8 to 4003.1, corresponding to a p-value of  $1.12\text{e-}4$  as determined by the loglikelihood ratio test.

| Model Type                     | Single Site Homog. | Single Site Mixture | Multi-site Homogeneous | Multi-site Mixture | CRF1   | CRF2             |
|--------------------------------|--------------------|---------------------|------------------------|--------------------|--------|------------------|
| Window Size                    | 1                  | 1                   | 8                      | 8                  | 8      | 8                |
| # Kinetic Rate Parameters      | 1                  | 2                   | 8                      | 16                 | 16     | 16               |
| # Mixing Proportion Parameters | 0                  | 1                   | 0                      | 8                  | 8      | 8                |
| # Interaction Parameters       | -                  | -                   | 0                      | 0                  | 1      | 2                |
| # Total Parameters             | 1                  | 3                   | 8                      | 24                 | 25     | 26               |
| - log likelihood               | 591.4              | 592.8               | 4038.2                 | 4010.8             | 4010.6 | 4003.1           |
| $\chi^2$ p-value               | -                  | 1.00                | -                      | $3.89\text{e-}6$   | 0.52   | $1.12\text{e-}4$ |

**Supplementary Table 2.** 95% confidence intervals for the GATC sites tested for 6-mA modifications in the pRRS plasmid in *M.EcoKdam* (as described in the main text).

| Position | Strand  | Cas Mean IPD | Control Mean IPD | Supervised Loglikelihood Ratio | Model Based P value (-log10) | Mixing Proportion Estimate | Lower Bound of 95% CI | Upper Bound of 95% CI |
|----------|---------|--------------|------------------|--------------------------------|------------------------------|----------------------------|-----------------------|-----------------------|
| 3122     | reverse | 13.69        | 1.74             | 2205.81                        | 480.75                       | 0.22                       | 0.16                  | 0.28                  |
| 307      | forward | 12.63        | 2.26             | 1874.98                        | 408.88                       | 0.23                       | 0.16                  | 0.30                  |
| 1219     | reverse | 13.91        | 1.93             | 3099.18                        | 674.82                       | 0.24                       | 0.17                  | 0.30                  |
| 2940     | reverse | 13.45        | 1.76             | 2439.40                        | 531.50                       | 0.24                       | 0.17                  | 0.30                  |
| 308      | reverse | 14.47        | 2.00             | 2830.52                        | 616.46                       | 0.22                       | 0.17                  | 0.26                  |
| 344      | reverse | 13.37        | 2.13             | 2694.46                        | 586.91                       | 0.24                       | 0.18                  | 0.30                  |
| 3315     | reverse | 13.15        | 2.07             | 1856.69                        | 404.91                       | 0.24                       | 0.18                  | 0.30                  |
| 1140     | forward | 11.61        | 1.64             | 3408.69                        | 742.05                       | 0.24                       | 0.18                  | 0.31                  |
| 3121     | forward | 13.28        | 2.04             | 1954.50                        | 426.16                       | 0.24                       | 0.18                  | 0.31                  |
| 3128     | reverse | 12.65        | 2.04             | 2054.60                        | 447.91                       | 0.24                       | 0.18                  | 0.30                  |
| 664      | forward | 13.68        | 1.79             | 2236.49                        | 487.42                       | 0.24                       | 0.19                  | 0.29                  |
| 1128     | forward | 11.66        | 1.60             | 2984.46                        | 649.90                       | 0.30                       | 0.19                  | 0.41                  |
| 2574     | forward | 9.70         | 1.40             | 2584.03                        | 562.92                       | 0.26                       | 0.19                  | 0.34                  |
| 2444     | forward | 12.05        | 1.65             | 2456.17                        | 535.14                       | 0.25                       | 0.19                  | 0.30                  |
| 3314     | forward | 16.00        | 2.29             | 1998.36                        | 435.69                       | 0.26                       | 0.20                  | 0.33                  |
| 360      | forward | 10.86        | 1.38             | 2655.24                        | 578.39                       | 0.26                       | 0.20                  | 0.32                  |
| 3127     | forward | 14.73        | 2.50             | 1765.80                        | 385.16                       | 0.27                       | 0.20                  | 0.33                  |
| 2900     | forward | 12.74        | 1.61             | 2430.56                        | 529.58                       | 0.27                       | 0.20                  | 0.33                  |
| 3109     | reverse | 15.24        | 2.51             | 1955.27                        | 426.33                       | 0.27                       | 0.20                  | 0.34                  |
| 2808     | forward | 10.89        | 1.33             | 2590.47                        | 564.32                       | 0.26                       | 0.21                  | 0.32                  |
| 682      | forward | 12.32        | 1.81             | 2259.95                        | 492.52                       | 0.26                       | 0.21                  | 0.32                  |
| 1237     | forward | 11.20        | 1.35             | 3572.79                        | 777.70                       | 0.27                       | 0.21                  | 0.33                  |
| 1227     | reverse | 12.51        | 1.73             | 3143.23                        | 684.39                       | 0.26                       | 0.21                  | 0.32                  |
| 1226     | forward | 15.92        | 2.25             | 2942.07                        | 640.70                       | 0.25                       | 0.21                  | 0.30                  |
| 343      | forward | 14.26        | 1.76             | 2717.85                        | 591.99                       | 0.30                       | 0.21                  | 0.40                  |
| 1313     | reverse | 11.61        | 1.46             | 2985.20                        | 650.06                       | 0.27                       | 0.21                  | 0.34                  |
| 361      | reverse | 15.37        | 1.70             | 2547.12                        | 554.90                       | 0.26                       | 0.21                  | 0.31                  |
| 1238     | reverse | 13.40        | 1.81             | 2972.19                        | 647.24                       | 0.27                       | 0.21                  | 0.33                  |
| 1141     | reverse | 14.07        | 1.93             | 3113.37                        | 677.90                       | 0.26                       | 0.21                  | 0.32                  |
| 2901     | reverse | 13.82        | 2.02             | 2207.48                        | 481.12                       | 0.27                       | 0.22                  | 0.33                  |
| 2939     | forward | 16.63        | 2.89             | 2060.82                        | 449.26                       | 0.29                       | 0.22                  | 0.36                  |
| 683      | reverse | 11.84        | 1.49             | 2554.09                        | 556.42                       | 0.27                       | 0.22                  | 0.33                  |
| 618      | forward | 13.69        | 1.89             | 2493.81                        | 543.32                       | 0.28                       | 0.22                  | 0.34                  |
| 3186     | reverse | 14.38        | 2.13             | 2250.24                        | 490.41                       | 0.29                       | 0.23                  | 0.36                  |
| 619      | reverse | 13.68        | 1.96             | 2422.79                        | 527.89                       | 0.28                       | 0.23                  | 0.33                  |
| 1312     | forward | 14.88        | 2.34             | 2762.38                        | 601.66                       | 0.31                       | 0.23                  | 0.38                  |
| 1024     | reverse | 14.15        | 2.46             | 2246.02                        | 489.49                       | 0.28                       | 0.23                  | 0.34                  |
| 1129     | reverse | 10.80        | 1.45             | 3486.92                        | 759.04                       | 0.29                       | 0.23                  | 0.34                  |
| 1023     | forward | 14.29        | 1.88             | 2630.61                        | 573.04                       | 0.30                       | 0.24                  | 0.37                  |
| 3108     | forward | 11.24        | 1.84             | 2052.24                        | 447.39                       | 0.29                       | 0.24                  | 0.35                  |
| 1218     | forward | 16.39        | 2.33             | 3013.97                        | 656.31                       | 0.30                       | 0.24                  | 0.36                  |
| 3185     | forward | 14.47        | 2.16             | 2116.75                        | 461.41                       | 0.30                       | 0.24                  | 0.36                  |
| 2445     | reverse | 12.84        | 1.73             | 2457.05                        | 535.33                       | 0.30                       | 0.24                  | 0.37                  |

|      |         |       |      |         |        |      |      |      |
|------|---------|-------|------|---------|--------|------|------|------|
| 2575 | reverse | 13.61 | 1.41 | 3114.26 | 678.10 | 0.32 | 0.25 | 0.38 |
| 665  | reverse | 15.38 | 3.08 | 2017.33 | 439.81 | 0.37 | 0.26 | 0.48 |
| 2809 | reverse | 19.80 | 2.65 | 2048.16 | 446.51 | 0.35 | 0.27 | 0.42 |

**Supplementary Table 3.** Number of significant detections (FDR < 0.05) made for each nucleotide type on the light and heavy strands of the mitochondrial genome. The numbers in bold parentheses in the light or heavy rows of the G column indicate the number of sites that were enriched for sequencing errors. The numbers in parentheses in the last row indicate the fold enrichment of observed divided the number expected from the background distribution of the four nucleotides.

| <b>Strand</b>                          | <b>G</b>        | <b>A</b>   | <b>T</b>   | <b>C</b>   | <b>Total</b> |
|----------------------------------------|-----------------|------------|------------|------------|--------------|
| <b>heavy</b>                           | 99 ( <b>9</b> ) | 12         | 36         | 25         | 172          |
| <b>light</b>                           | 42 ( <b>3</b> ) | 22         | 18         | 48         | 130          |
| <b>Both</b>                            | 141             | 34         | 54         | 73         | 302          |
| <b>Expected Count<br/>Both Strands</b> | 67 (2.1x)‡      | 85 (0.4x)† | 90 (0.6x)† | 72 (1.01x) |              |

‡ Enrichment p value << 0.01

† Under-enrichment p value << 0.01

**Supplementary Table 4.** Adenosine residues in the mtDNA genome detected as significantly kinetically varying and greater than 20 bases away from the nearest neighboring kinetic variation site.

| Strand | mtDNA Position | Closest C Kinetic Variation Event | Closest G Kinetic Variation Event | Closest T Kinetic Variation Event | Minimum Distance |
|--------|----------------|-----------------------------------|-----------------------------------|-----------------------------------|------------------|
| heavy  | 2579           | 58                                | 69                                | 135                               | 58               |
| heavy  | 2607           | 75                                | 41                                | 163                               | 41               |
| heavy  | 1644           | 33                                | 60                                | 63                                | 33               |
| heavy  | 3862           | 35                                | 32                                | 47                                | 32               |
| heavy  | 2252           | 29                                | 102                               | 76                                | 29               |
| heavy  | 1637           | 28                                | 53                                | 56                                | 28               |
| heavy  | 1124           | 28                                | 29                                | 90                                | 28               |
| light  | 4150           | 77                                | 82                                | 94                                | 77               |
| light  | 1898           | 401                               | 70                                | 97                                | 70               |
| light  | 4108           | 101                               | 87                                | 52                                | 52               |
| light  | 1008           | 45                                | 53                                | 41                                | 41               |
| light  | 5237           | 30                                | 28                                | 35                                | 28               |
| light  | 3309           | 40                                | 26                                | 66                                | 26               |
| light  | 5159           | 24                                | 106                               | 30                                | 24               |

**Supplementary Table 5.** The twelve mtDNA kinetic variation events at A residues validated using synthetic oligonucleotides.

| Position in the mtDNA Genome | Strand | Log-Likelihood Ratio – log10 (P value) | 21 Base Context (x is the KVE A residue) | Full Oligonucleotide Sequence                              |
|------------------------------|--------|----------------------------------------|------------------------------------------|------------------------------------------------------------|
| 8003                         | +      | 12.4123                                | TGACGTTGACxATCGAGTAGT                    | /5Phos/cccgCCTCTACCTAxAACTCACAGCTGACGTTGACxATCGAGTAGTcaac  |
| 782                          | +      | 11.807                                 | ATGCAGCTCAxAACGCTTAGC                    | /5Phos/cccgCTTTAGCAATxAACGAAAAGTTATGCAGCTCAxAACGCTTAGCcaac |
| 8548                         | -      | 9.9688                                 | GCAATGAATGxAGCGAACAGA                    | /5Phos/cccgGGTGGCACGGxGAATTTTGGAGCAATGAATGxAGCGAACAGAcaac  |
| 15751                        | +      | 9.1899                                 | TCCTCATTCTxACCTGAATCG                    | /5Phos/cccgTCCTCATTCTxACCTGAATCGTACACAATCAxAGACGCCCTCcaac  |
| 839                          | +      | 8.8488                                 | CTTTAGCAATxAACGAAAAGTT                   | /5Phos/cccgCTTTAGCAATxAACGAAAAGTTATGCAGCTCAxAACGCTTAGCcaac |
| 13795                        | +      | 8.2646                                 | CCTCTACCTAxAACTCACAGC                    | /5Phos/cccgCCTCTACCTAxAACTCACAGCTGACGTTGACxATCGAGTAGTcaac  |
| 15426                        | +      | 8.0786                                 | TACACAATCAxAGACGCCCTC                    | /5Phos/cccgTCCTCATTCTxACCTGAATCGTACACAATCAxAGACGCCCTCcaac  |
| 1583                         | +      | 7.4617                                 | AGTGTACTGGxAAGTGCACTT                    | /5Phos/cccgCTTCGCTTCGxAGCGAAAAGTAGTGTACTGGxAAGTGCACTTcaac  |
| 15963                        | +      | 7.2953                                 | ATTTCTGAAAAAGAGACTAAA                    | /5Phos/cccgCTAAGATTCTxATTTAAACTAAAATCAGAGAxAAAGTCTTTAcaac  |
| 7338                         | +      | 7.1054                                 | CTTCGCTTCGxAGCGAAAAGT                    | /5Phos/cccgCTTCGCTTCGxAGCGAAAAGTAGTGTACTGGxAAGTGCACTTcaac  |
| 16006                        | +      | 6.9358                                 | CTAAGATTCTxATTTAAACTA                    | /5Phos/cccgCTAAGATTCTxATTTAAACTAAAATCAGAGAxAAAGTCTTTAcaac  |
| 4373                         | -      | 6.8701                                 | GGTGGCACGGxGAATTTTGGA                    | /5Phos/cccgGGTGGCACGGxGAATTTTGGAGCAATGAATGxAGCGAACAGAcaac  |

## Supplementary Figures

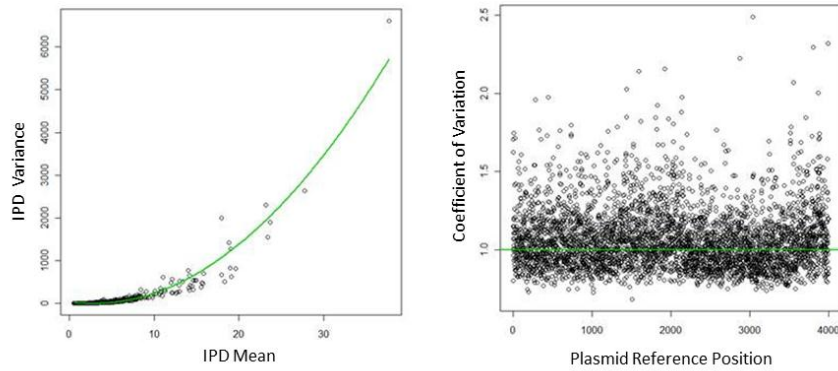

**Supplementary Figure 1.** Assessing the relationship between mean and variance in interpulse durations (IPD). The left plot compares IPD variance to IPD mean using the M.Sau3AI plasmid data. The quadratic relationship between the mean and variance measures is the relationship expected for an exponential distribution. The right plot examines the coefficient of variation for IPD values as a function of position in the plasmid for the M.Sau3AI data. The average value across the genome is approximately 1.06, close to the expected value of 1 if the data were exponentially distributed.

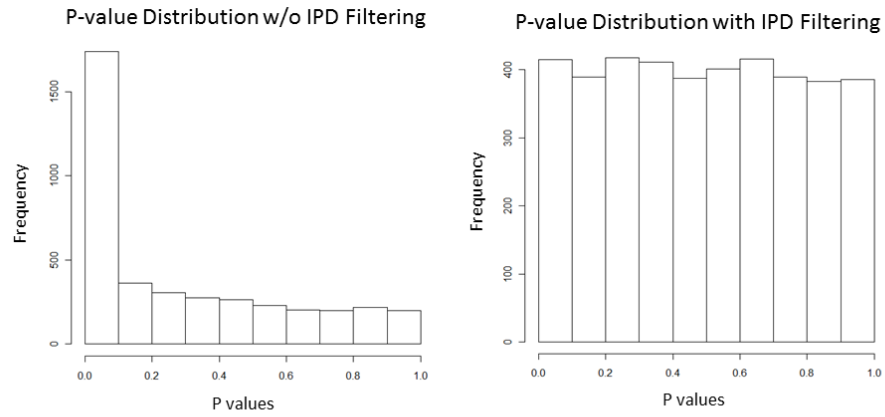

**Supplementary Figure 2.** P value distribution for the single site exponential model. **A)** P value distribution without filtering out very long IPD values. **B)** P value distribution after filtering out very long IPD values.



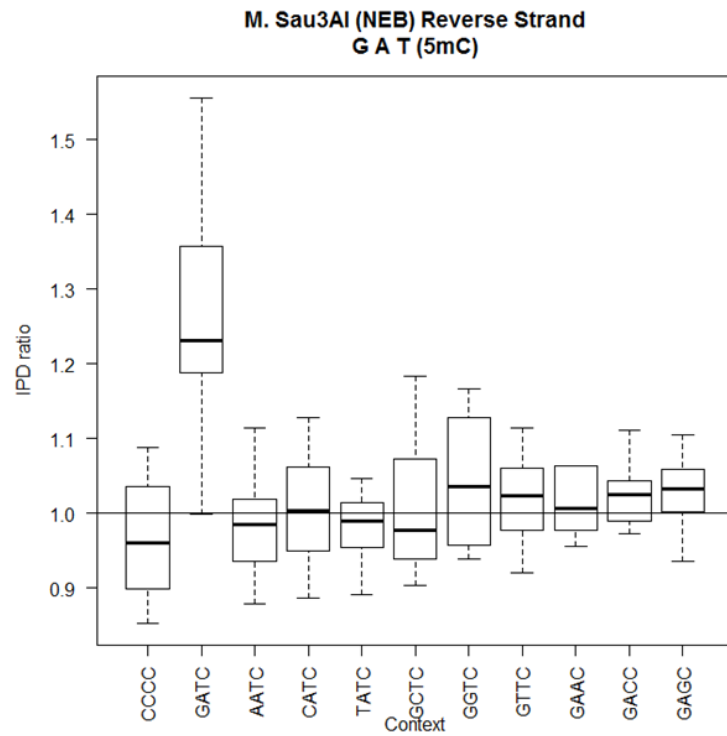

**Supplementary Figure 3.** Box plot of the IPD ratios for all 4mer contexts in the pRRS plasmid ending with a C residue. Only the GATC context is observed to give rise to IPD ratios that are significantly greater than one, confirming the specificity of the methyltransferase Sau3AI for the GATC context.

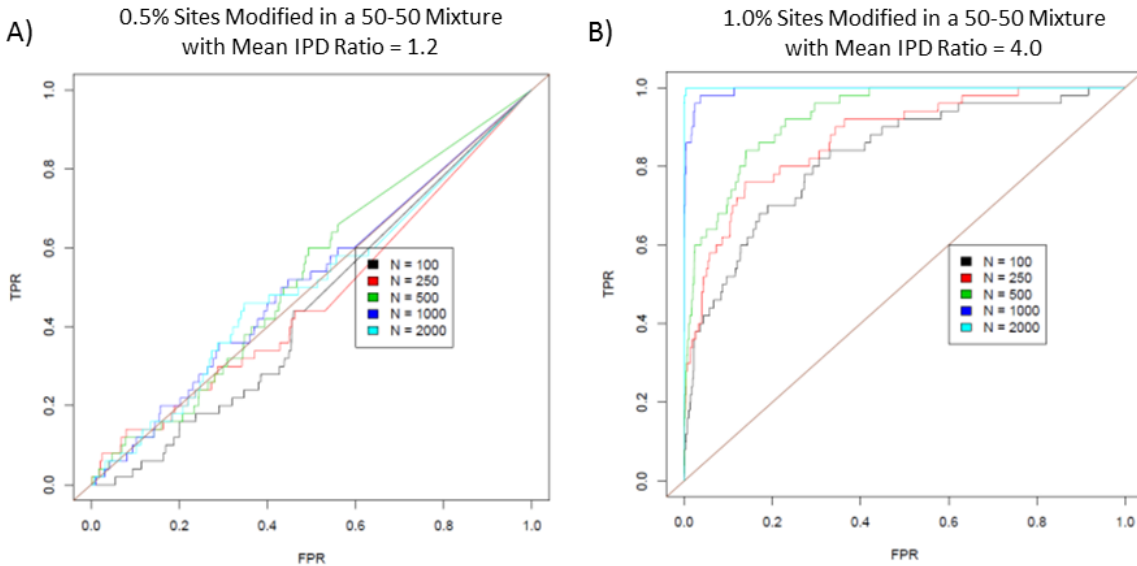

**Supplementary Figure 4.** ROC curves for simulated 5-methyl-C data using the full CRF model allowing for nearest neighbor interactions. **A)** Using the plasmid sequence described in the main text, 0.5% of the sites were simulated as having the 5-methyl-C modification in a 50-50 mixture (50% of the sequences with respect to a given site having the modification and 50% having no modification), with the mean IPD ratio between modified and unmodified sites simulated to be 1.2, the mean ratio we observed in the M.Sau3AI data set between amplified and observed sequence data. Even as the sample size is increased from 100 to 2000, the area under the ROC curve does not increase significantly beyond 0.5 (what we would expect by chance). **B)** Similar to panel A), but now we have increased the mean IPD ratio to 4.0 and increased the number of modified sites to 1%. In this case, with very significantly increased signal to noise, the unsupervised model readily identifies the mixtures at the different modified sites. By the time the sample size hits 2000, we are able to perfectly identify the affected sites using the unsupervised model without any false positives.

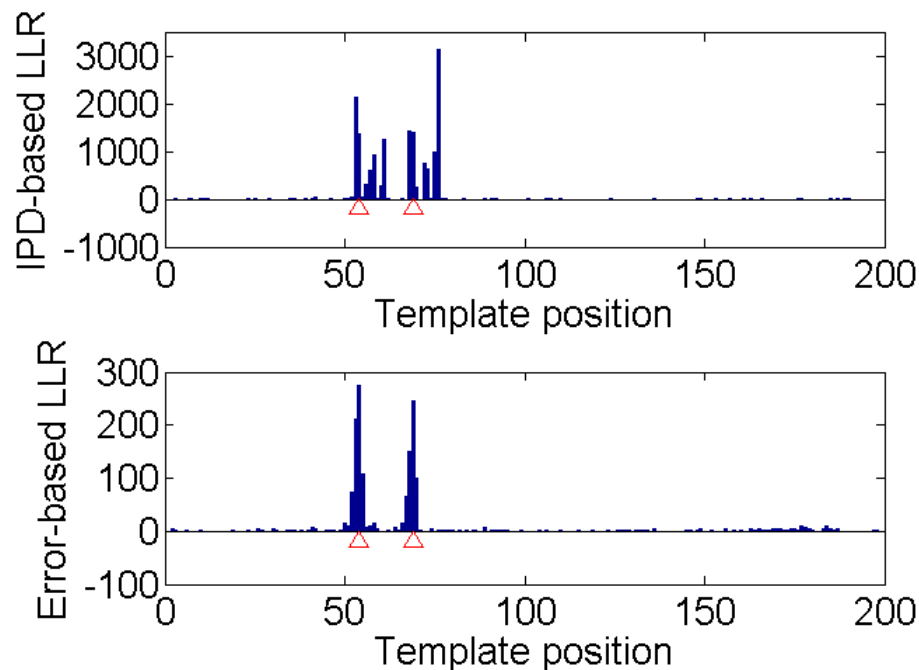

**Supplementary Figure 5.** IPD and error profiles predict 8-oxo-G events. In the upper panel the IPD-based loglikelihood ratio (LLR) statistics are plotted for each position in the 200bp artificial template in which 8-oxo-G lesions were induced at two positions (red triangles). The only significant signal occurs at the locations of the 8-oxo-G events, with IPDs at many of the sites in the neighborhood of the lesions affected. The lower panel depicts the LLR test statistics for the error profile at each position. Single molecule allelic differences at a given site compared to the reference sequence adds to the significance of this statistic. The high LLR values in this panel indicates very significantly rates of error at and around the location of 8-oxo-G events.

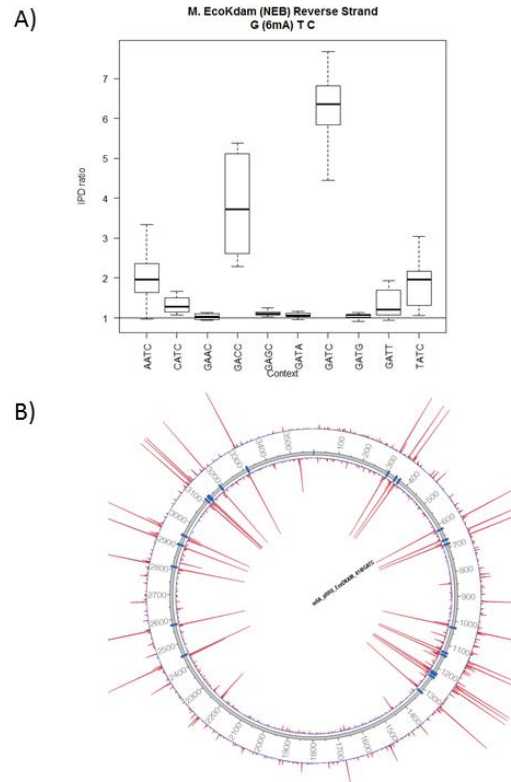

**Supplementary Figure 6.** Detection of M.EcoKdam induced modification events. **A)** Box plots for the IPD ratios of the A residues in the indicated 4mer contexts for the M.EcoKdam data. The IPD ratios for the GATC context as expected are significantly greater than 1, but also unexpectedly for the GACC and AATC contexts. **B)** Plasmid pRRS depicted as a circos plot, with the inside of the annulus representing the coordinates of the plasmid, the blue hash marks indicating A residues in a GATC context, and the two red curves representing  $-\log_{10}(\text{p value})$  for the single site likelihood model for the two DNA strands. The p values are based on the full 500 coverage of the plasmid genome.

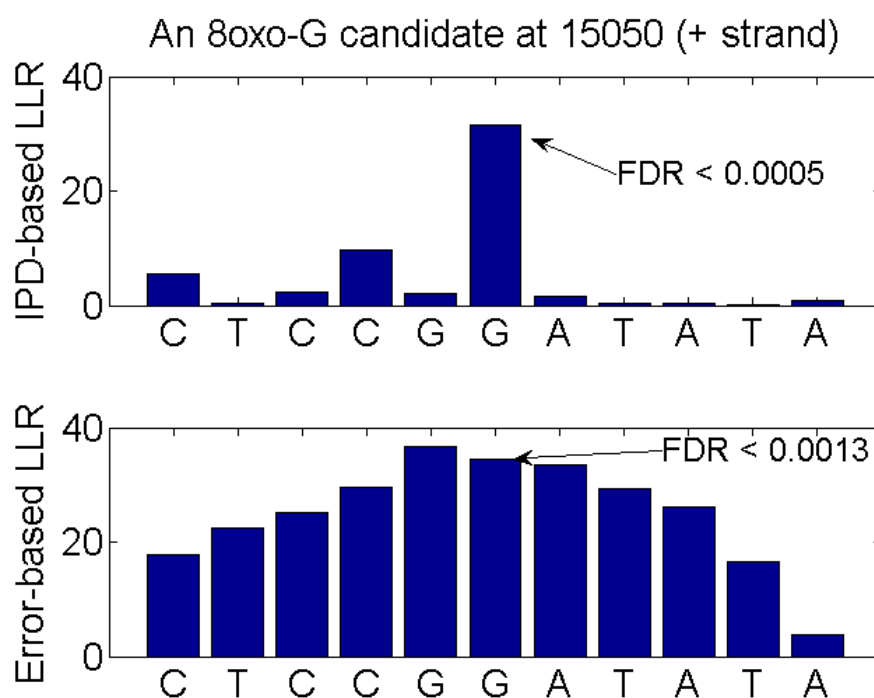

**Supplementary Figure 7.** Example of a putative 8-oxo-G event at position 15,050 on the positive strand of the mtDNA genome (displayed in 3' to 5' orientation). The upper panel highlights a very significant loglikelihood ratio test statistic at this position ( $p \sim 5e-8$ ), indicating that the IPDs at this position in the native sample were significantly longer than the IPDs in the control sample. The bottom panel indicates a significantly elevated error rate at this position and in the neighborhood of this position.

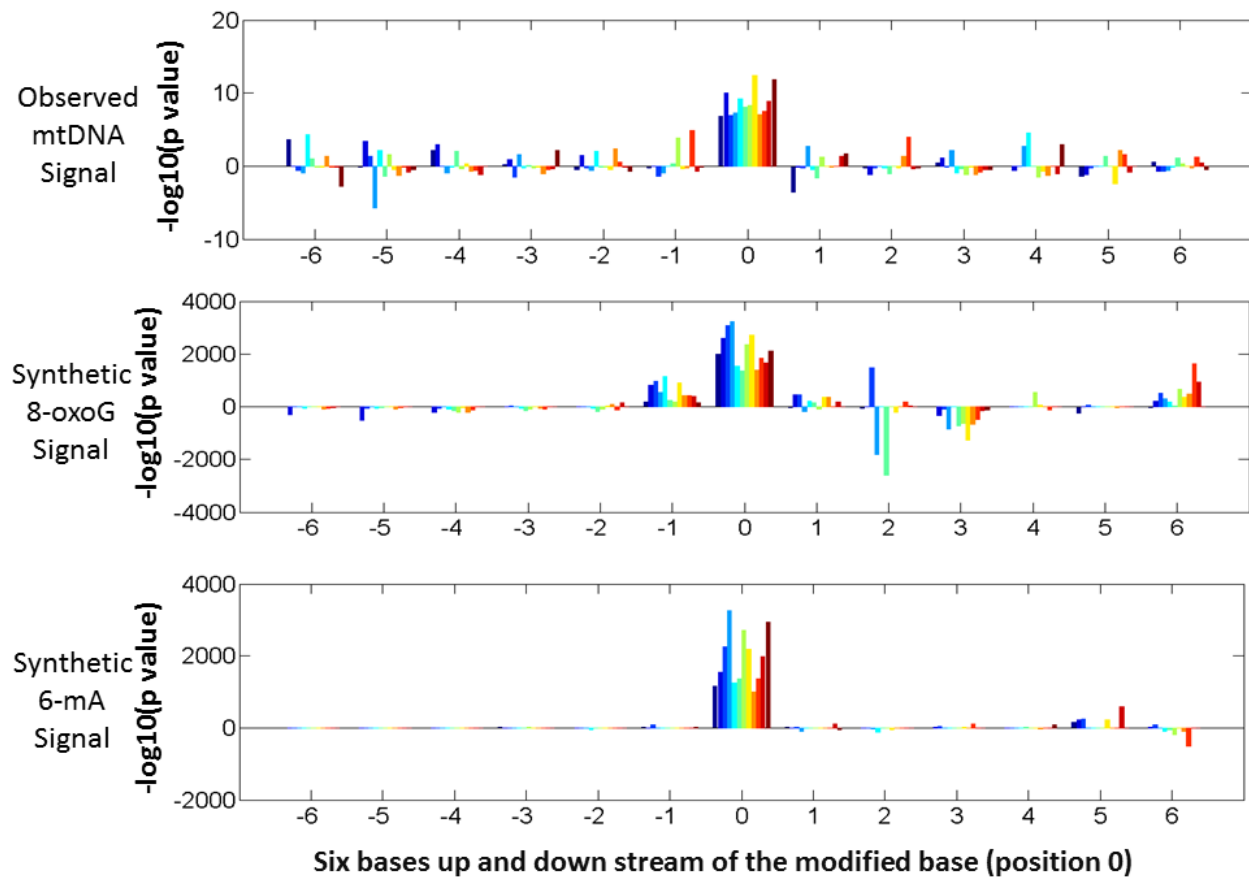

**Supplementary Figure 8.** Classifying kinetic variation events by comparing observed KVE signals to KVE signals induced by known modification types in the same context. Twelve putative 6-mA events were identified from the mtDNA KVE signature for validation. The KVE signal for these twelve different events are depicted in the top graph, with the 12 color bars for each of the 13 positions depicted representing the signal for each KVE. The x-axis represents the 6 bases upstream and 6 downstream of the KVE of interest (at position 0). The y-axis represents the log likelihood ratio for the kinetic variation at the site detected (position 0) and for the positions flanking the site detected. The second and third graphs represent the kinetic variation signature for the original 12 KVEs identified in the mtDNA, but with oligos for the corresponding flanking sequences synthesized so that position 0 harbored 8-oxo-A and 6-mA modification events corresponding to the second and third graphs, respectively. A comparison of the first and second graphs indicates secondary peaks at position -1, +1, and +6 for the 8-oxo-A graph but not for the observed mtDNA graph, whereas the signal for the third graph with strong, consistent signal in both cases only apparent at position 0, consistent with a 6-mA event.
